# Supplementary material for: The Rabl chromosome configuration masks a kinetochore reassembly mechanism in yeast mitosis
Source: PubMed Central journal article supplement — Mol Biol Cell. 2022 Apr 14;33(5):br8. doi: 10.1091/mbc.E20-09-0600 (PMC9282007; doi:10.1091/mbc.e20-09-0600), 2022-04-14
Supplement: mbc-33-br8-s001.pdf [file mbc-33-br8-s001.pdf]

# Supplementary Materials

*Molecular Biology of the Cell*

Jiménez-Martín *et al.*

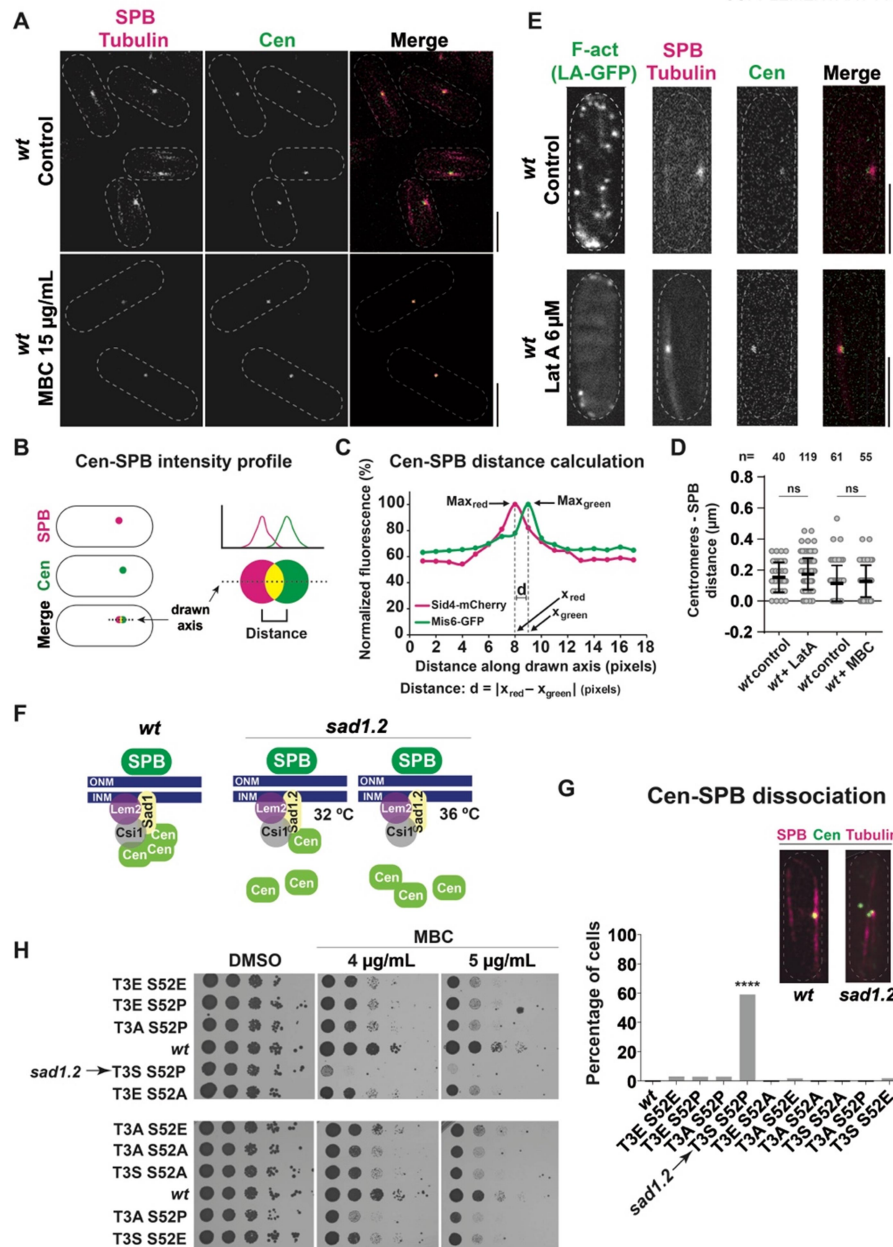

**Supplementary Figure 1 (related to Figure 1). Probing requirements for the Rab1 chromosome configuration in fission yeast.**

(A) Centromere-SPB association patterns upon addition of the microtubule-depolymerizing drug carbendazim (MBC, 15  $\mu\text{g}/\text{mL}$ ). Centromere (Cen) imaged via endogenously tagged Mis6-GFP. Sid4-mCherry (endogenously tagged; SPB) and ectopically expressed mCherry-Atb2 (Tubulin). Scale bars

represent 5  $\mu\text{m}$ . (B-C) Scheme of the quantification method followed to measure the distance between the centromere and the SPB. (D) The distance between the SPB and the centromeres is shown;  $n$  is the total number of cells scored from more than three independent experiments. Data were subject to Fisher's exact test: *ns* = not significant. (E) The centromere-SPB associations remains intact upon the addition of the actin-depolymerizing drug Latrunculin A (Lat A, 6  $\mu\text{M}$ ). F-Actin was visualized via the GFP-tagged Lifeact label (LA-GFP). (F) Schematic of the centromere-SPB organization during interphase in *wt* and *sad1.2* cells, at 32°C and 36°C. ONM, outer nuclear membrane; INM, inner nuclear membrane (Fernandez-Alvarez and Cooper, 2017b). (G) Quantification of centromere-SPB dissociations. Tags as in (A). Scale bar means 5  $\mu\text{m}$ . 50 cells were scored for each genotype over more than three independent experiments. Fisher's exact test: \*\*\*\*,  $p < 0.0001$ . (H) Serial dilutions (5-fold) of log-phase cultures were spotted and grown on rich media with DMSO (control) and rich media containing MBC, and incubated at 32°C during 48 h.

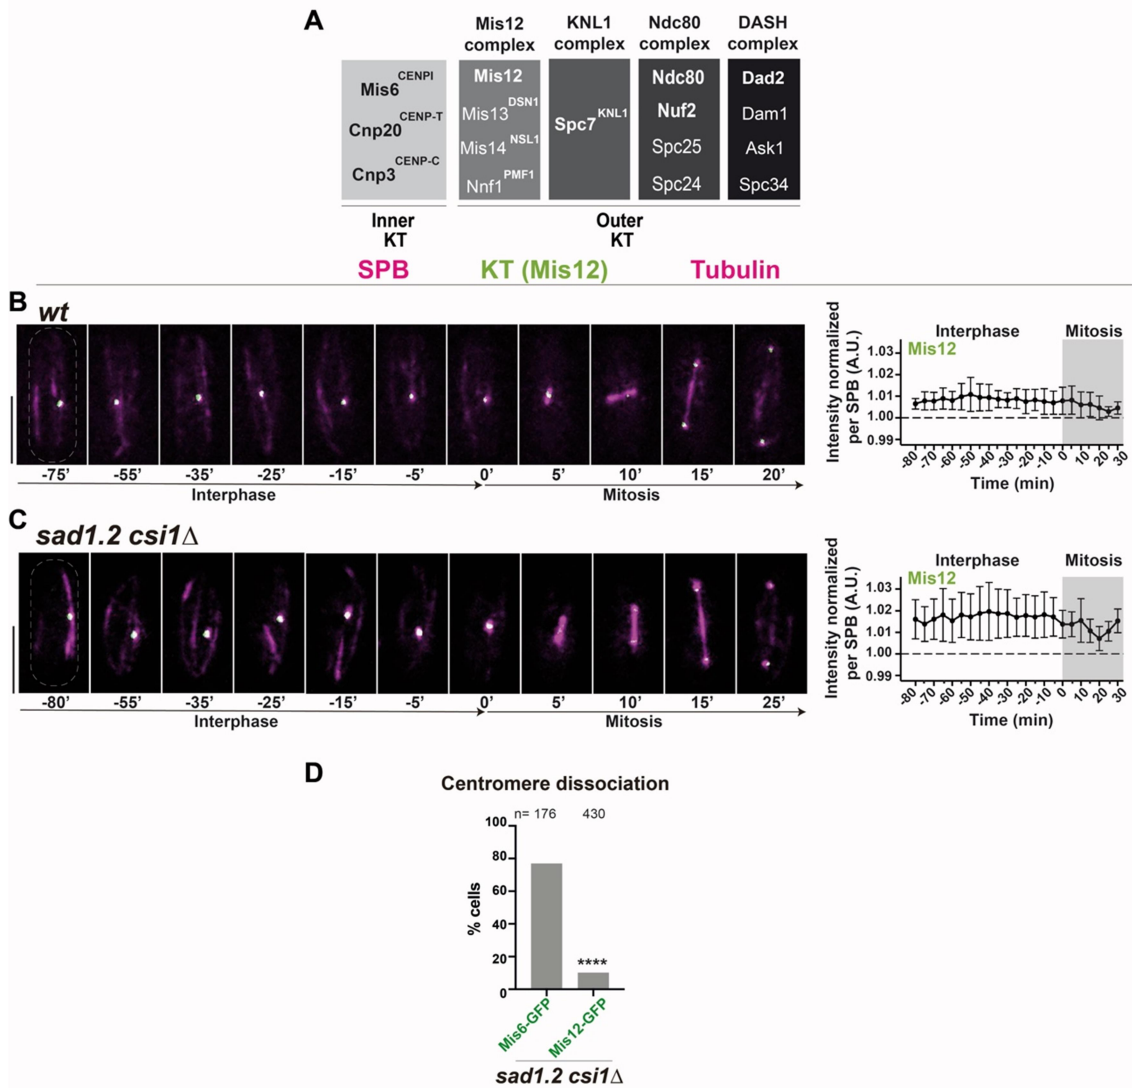

Supplementary Figure 2 (related to Figure 2). The endogenous GFP-tagging of Mis12 reduces the penetrance of centromere-SPB dissociation defects in *sad1.2 csi1Δ* cells.

(A) Main components of the *S. pombe* outer kinetochore, modified from (Hayashi et al., 2006). Uppercase fonts represent orthologs in humans when the name is different in yeast. In bold, the proteins explored in this study. (B-C) Frames from films of cells carrying Sid4-mCherry (SPB), ectopically expressed mCherry-Atb2 (Tubulin), and endogenously tagged Mis12-GFP. Scale bars represent 5  $\mu$ m. Mis12-GFP intensity was quantified as in Figure 2. 10 cells during more than three independent experiments were monitored for focal

intensity of Mis12-GFP. Error bars represent standard deviations;  $t = 0$  min is just before SPB spindle formation. (D) Quantification of centromere-SPB dissociations.  $n$  is the total number of cells scored from more than two independent experiments.  $p$ -value was determined by Fisher's exact test, \*\*\*\*  $p < 0.0001$ .

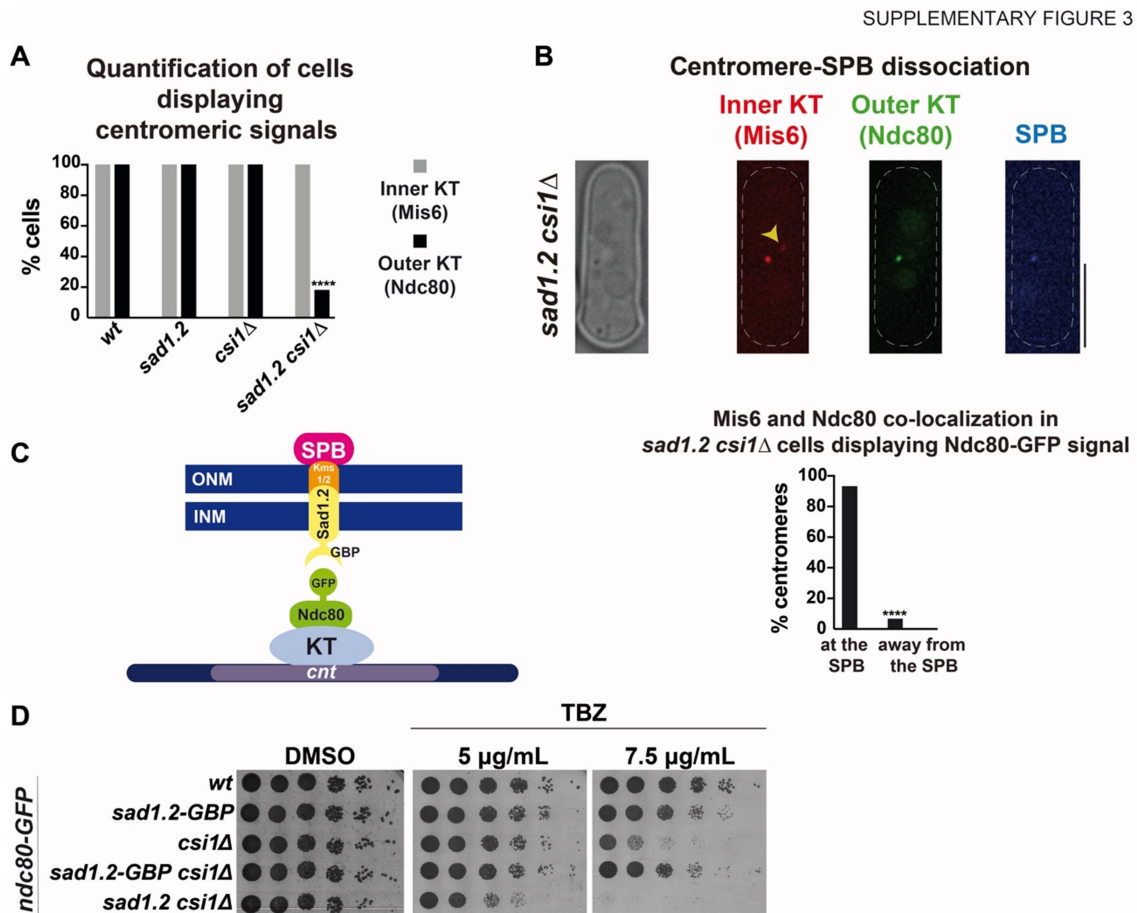

Supplementary Figure 3 (controls for Figure 3). Outer kinetochore is dissociated from centromeres during interphase in *Rab1* configuration-deficient cells.

(A) Quantification of the phenotypes showed in Figures 2 and 3 for Mis6 and Ndc80 proteins, respectively. 50 cells for each genotype were scored during more than three independent experiments.  $p$ -value was determined by Fisher's exact test, \*\*\*\*  $p < 0.0001$ . (B) Ndc80 localization is abolished in centromeres detached from the SPB (pointed by yellow arrow). Quantification of this phenotype was performed during five independent experiments scoring 68

*sad1.2 csi1Δ* cells displaying Ndc80-GFP signal. *p*-value was determined by Fisher's exact test, \*\*\*\*  $p < 0.0001$ . *sad1.2 csi1Δ* cells were endogenously tagged Mis6-mCherry (inner kinetochore, KT), Ndc80-GFP (outer kinetochore, KT), and endogenously tagged Sad1.2-Turquoise2 (SPB). Bar represents 5  $\mu\text{m}$ . (C) Schematic of GFP-GBP system used to force interaction between Sad1.2 and centromeres. (D) Serial dilution of log-phase cultures was spotted and analysed as in Figure 1C but using TBZ as microtubule depolymerizing drug.

| Strain  | Relevant genotype                                                                                                                   | Source      | Figure                                                      |
|---------|-------------------------------------------------------------------------------------------------------------------------------------|-------------|-------------------------------------------------------------|
| AFA394  | <i>h+ ade6-M216 ura4-D18 leu1-32 lem2Δ::natMX6 csi1Δ::bleMX6</i>                                                                    | This work   | Fig. 1A, B, C                                               |
| AFA1020 | <i>h- ade6-M210 ura4-D18 leu1-32 sad1. T3S. S52P-13Myc:hphMX6 csi1Δ::natMX6</i>                                                     | This work   | Fig. 1A, B, C                                               |
| AFA10   | <i>h+ ade6-M216</i>                                                                                                                 | Lab stock   | Fig. 1B, C                                                  |
| AFA217  | <i>h- ade6-M216 sad1. T3S. S52P-13Myc:natMX6</i>                                                                                    | Lab stock   | Fig. 1B, C                                                  |
| AFA1536 | <i>h- ade6-M216 leu1-32 csi1::natMX6</i>                                                                                            | Lab stock   | Fig. 1B, C                                                  |
| AFA1540 | <i>h+ ade6-M216 lem2::natMX6</i>                                                                                                    | Lab stock   | Fig. 1B, C                                                  |
| AFA1556 | <i>h90 ade6-M216 sad1. T3S. S52P-13Myc:hphMX6 lem2::natMX6</i>                                                                      | This work   | Fig. 1B, C                                                  |
| AFA25   | <i>h90 ade6-M210 leu1-32 Pnda3-mCherry-atb2:aur1 sid4-mCherry:natMX6 mis6-GFP:kanMX6</i>                                            | This work   | Fig. 1D, G, H, I; Fig. 2A; Fig. S1 A, D, E, G, H; Fig. S3 A |
| AFA166  | <i>h90 ade6-M210 leu1-32 Pnda3-mCherry-atb2:aur1 sid4-mCherry:natMX6 mis6-GFP:kanMX6 sad1. T3S. S52P-13Myc:hphMX6 csi1Δ::bleMX6</i> | This work   | Fig. 1E, F, G, H, I; Fig. 2B, C; Fig. S2 D; Fig. S3 A       |
| AFA131  | <i>h90 ade6-M216 Pnda3-mCherry-atb2:aur1 sid4-mCherry:natMX6 mis6-GFP:kanMX6 sad1. T3S. S52P-13Myc:hphMX6</i>                       | This work   | Fig. 1G, H, I; Fig. S1 G, H; Fig. S3A                       |
| AFA1    | <i>h- ade6-M210 leu1-32 Pnda3-mCherry-atb2:aur1 sid4-mCherry:natMX6 mis6-GFP:kanMX6 csi1Δ::bleMX6</i>                               | This work   | Fig. 1G, H, I; Fig. S3 A                                    |
| AFA1071 | <i>h- ade6 ura4-D18 leu1-32 mis6-GFP:kanMX6 Pnda3-mCherry-atb2:aur1 sid4-mCherry:natMX6 lem2::natMX6</i>                            | This work   | Fig. 1G, H, I                                               |
| AFA1500 | <i>h- ade6-M216 mis6-GFP:kanMX6 sad1. T3S. S52P-13Myc:hphMX6 lem2::natMX6</i>                                                       | This work   | Fig. 1G, H, I                                               |
| AFA1072 | <i>h- ade6 ura4-D18 leu1-32 mis6-GFP:kanMX6 Pnda3-mCherry-atb2:aur1 sid4-mCherry:natMX6 lem2::natMX6 csi1::bleMX6</i>               | This work   | Fig. 1G, H, I                                               |
| AFA21   | <i>h+ ade6-M210 Pnda3-mCherry-atb2:aur1 sid4-mCherry:natMX6 cnp20-GFP:kanMx6</i>                                                    | This work   | Fig. 2D                                                     |
| AFA1033 | <i>h90 ade6-M210 Pnda3-mCherry-atb2:aur1 sid4-mCherry:NatMX6 cnp20-GFP:kanMx6 sad1. T3S. S52P-13Myc:hphMX6 csi1Δ::bleMX6</i>        | This work   | Fig. 2E, F                                                  |
| AFA1506 | <i>h90 ade6-M210 leu1-32 Pnda3-mCherry-atb2:aur1 sid4-mCherry:natMX6 ndc80-GFP:kanMX6</i>                                           | This work   | Fig. 3A; Fig. S3 A, D                                       |
| AFA459  | <i>h90 ade6-M216 Pnda3-mCherry-atb2:aur1 sid4-mCherry:natMX6 ndc80-GFP:kanMx6 sad1. T3S. S52P-13Myc:hphMX6 csi1Δ::bleMX6</i>        | This work   | Fig. 3B; Fig. S3 A, D                                       |
| AFA630  | <i>h90 ade6-M216 leu1-32 Pnda3-mCherry-atb2:aur1 sid4-mcherry:natMX6 ndc80-GFP:kanMX6 sad1. T3S. S52P-GBP:hphMX6 csi1Δ:natMX6</i>   | This work   | Fig. 3C; Fig. S3 D                                          |
| AFA6    | <i>h+ ade6-M216 leu1-32 ura4-D18 Pnda3-mCherry-atb2:aur1 sid4-mCherry:natMX6 nuf2-GFP-HA:kanMX</i>                                  | This work   | Fig. 3D                                                     |
| AFA1047 | <i>h90 ade6-M216 Pnda3-mCherry-atb2:aur1 sid4-mCherry:natMX6 nuf2-HA-GFP:kanMX6 sad1. T3S. S52P-13Myc:hphMX6 csi1Δ::bleMX6</i>      | This work   | Fig. 3E                                                     |
| AFA1740 | <i>h- cdc25-22</i>                                                                                                                  | Jiménez lab | Fig. 4A                                                     |
| AFA1944 | <i>h- cdc25-22 ndc80-GFP-HA:kanMX6</i>                                                                                              | This work   | Fig. 4A                                                     |
| AFA1945 | <i>h- cdc25-22 ndc80-GFP-HA:kanMX6 sad1. T3S. S52P-GBP:hphMX6 csi1Δ:natMX6</i>                                                      | This work   | Fig. 4A                                                     |

| Strain  | Relevant genotype                                                                                                                                   | Source     | Figure       |
|---------|-----------------------------------------------------------------------------------------------------------------------------------------------------|------------|--------------|
| AFA456  | <i>h- cdc10-129</i>                                                                                                                                 | Moreno lab | Fig. 4A, B   |
| AFA1951 | <i>h- cdc10-129 ndc80-GFP-HA:kanMX6</i>                                                                                                             | This work  | Fig. 4A, B   |
| AFA1938 | <i>h- cdc10-129 ndc80-GFP-HA:kanMX6 sad1. T3S. S52P-GBP:hphMX6 csi1Δ::natMX6</i>                                                                    | This work  | Fig. 4A, B   |
| AFA1662 | <i>h- ade6-M210 leu1-32 Pnda3-mCherry-atb2:aur1 sid4-mCherry:natMX6 spc7-GFP:kanMX6</i>                                                             | This work  | Fig. 4C      |
| AFA1675 | <i>h+ ade6-M210 leu1-32 Pnda3-mCherry-atb2:aur1 sid4-mCherry:natMX6 spc7-GFP:kanMX6 sad1. T3S. S52P-13Myc:hphMX6 csi1Δ::natMX6</i>                  | This work  | Fig. 4D      |
| AFA832  | <i>h+ ade6-216 leu1-32 ura4-D18 Pnda3-mCherry-atb2:aur1 sid4-mCherry:natMX6 dad2::dad2-GFP-HA:kanMX6</i>                                            | This work  | Fig. 4E      |
| AFA1059 | <i>h+ ade6-M216 leu1-32 ura4-D18 Pnda3-mCherry-atb2:aur1 sid4-mCherry:natMX6 dad2::dad2-GFP-HA:kanMX6 sad1. T3S. S52P-13Myc:hphMX6 csi1::bleMX6</i> | This work  | Fig. 4F      |
| AFA90   | <i>ade6-M216 sad1. T3E. S52E-GFP:kanMX6 mis6-mCherry:natMX6</i>                                                                                     | This work  | Fig. S1 G, H |
| AFA103  | <i>ade6-M216 sad1. T3E. S52P-GFP:kanMX6 mis6-mCherry:natMX6</i>                                                                                     | This work  | Fig. S1 G, H |
| AFA106  | <i>ade6-M210 sad1. T3A. S52P-GFP:kanMX6 mis6-mCherry:natMX6</i>                                                                                     | This work  | Fig. S1 G, H |
| AFA181  | <i>ade6-M210 sad1. T3E. S52A-GFP:kanMX6 mis6-mCherry:natMX6</i>                                                                                     | This work  | Fig. S1 G, H |
| AFA73   | <i>ade6 sad1. T3A. S52E-GFP:kanMX6 mis6-mCherry:natMX6</i>                                                                                          | This work  | Fig. S1 G, H |
| AFA76   | <i>ade6 sad1. T3A. S52A-GFP:kanMX6 mis6-mCherry:natMX6</i>                                                                                          | This work  | Fig. S1 G, H |
| AFA79   | <i>ade6 sad1. T3S. S52A-GFP:kanMX6 mis6-mCherry:natMX6</i>                                                                                          | This work  | Fig. S1 G, H |
| AFA85   | <i>ade6 sad1. T3S. S52E-GFP:kanMX6 mis6-mCherry:natMX6</i>                                                                                          | This work  | Fig. S1 G, H |
| AFA7    | <i>h- ade6-M216 leu1-32 ura4-D18 his2-D1 Pnda3-mCherry-atb2:aur1 sid4-mCherry:natMX6 mis12-GFP-HA:kanMX6</i>                                        | This work  | Fig. S2 B    |
| AFA1052 | <i>h- ade6-M216 Pnda3-mCherry-atb2::aur1 sid4-mCherry::natMX6 mis12-HA-GFP:kanMX6 sad1. T3S. S52P-13Myc:hphMX6 csi1Δ::bleMX6</i>                    | This work  | Fig. S2 C, D |
| AFA1030 | <i>h90 ade6-M216 Pnda3-mcherry-atb2:aur1 sid4-mCherry:natMX6 ndc80-GFP:kanMX6 sad1. T3S. S52P-13Myc:hphMX6</i>                                      | This work  | Fig. S3 A    |
| AFA1568 | <i>h90 ade6-M216 leu1-32 Pnda3-mCherry-atb2:aur1R sid4-mCherry:natMX6 ndc80-GFP:kanMX6 csi1Δ::bleMX6</i>                                            | This work  | Fig. S3 A, D |
| AFA1069 | <i>h90 ade6+ leu1-32 mis6-mCherry:hphMX6 ndc80-GFP:kanMX6 sad1. T3S. S52P-turq2:natMX6 csi1::bleMX6</i>                                             | This work  | Fig. S3 B    |
| AFA627  | <i>h90 ade6-M216 leu1-32 Pnda3-mCherry-atb2:aur1 sid4-mcherry:natMX6 ndc80-GFP:kanMX6 sad1. T3S. S52P-GBP:hphMX6</i>                                | This work  | Fig. S3 D    |

**Supplementary Table 1.** Strains used in this study.



| <b>Primer</b> | <b>Name</b>   | <b>Sequence</b>       | <b>Figure</b> |
|---------------|---------------|-----------------------|---------------|
| oAFA14        | act1_FW       | GATTCTCATGGAGCGTGGTT  | Fig. 4B       |
| oAFA15        | act1_REV      | CGCTCGTTTCCGATAGTGAT  | Fig. 4B       |
| oAFA119       | cnt1/cnt3_FW  | AGCGAAACCATGTGAGCATGT | Fig. 4B       |
| oAFA120       | cnt1/cnt3_REV | AGGCTGCTTGCTCTTTTCGT  | Fig. 4B       |

**Supplementary Table 2.** Primers used in this study for ChIP-qPCR experiments.
